# Supplementary material for: Structural and functional analysis of the repressor complex in the Notch signaling pathway of Drosophila melanogaster
Source: PubMed Central journal article supplement — Mol Biol Cell. 2011 Sep 1;22(17):3242–52. doi: 10.1091/mbc.E11-05-0420 (PMC3164469; doi:10.1091/mbc.e11-05-0420), 2011-09-01
Supplement: supp_E11-05-0420_CombinedSupMats.pdf [file supp_E11-05-0420_CombinedSupMats.pdf]

Supplemental Data to

**Structural and functional analysis of the repressor complex in the Notch signaling pathway of *D. melanogaster***

Dieter Maier, Patricia Kurth, Adriana Schulz, Andrew Russell, Zhenyu Yuan, Kim Gruber, Rhett A. Kovall, and Anette Preiss

**Figure S1** Conservation of CSL protein structure.

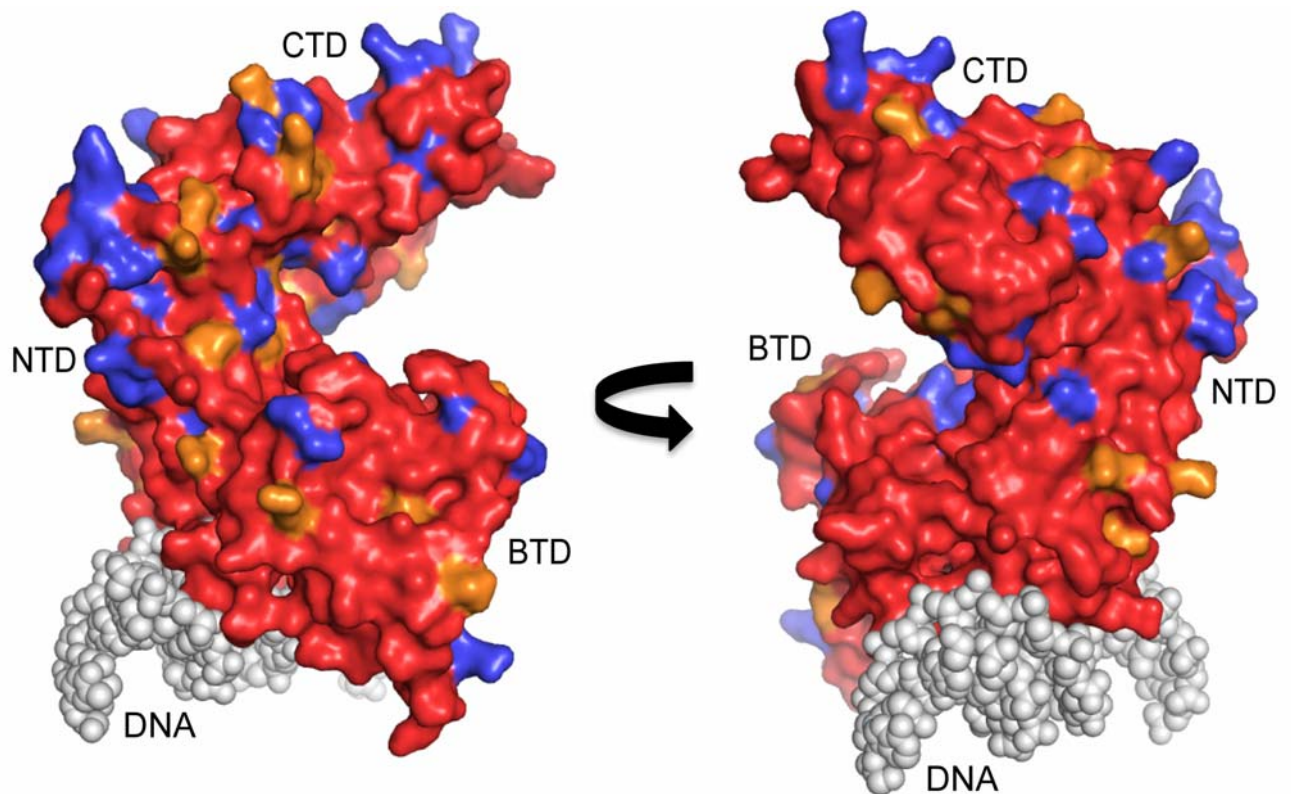

The sequence conservation between fly and mammalian proteins has been mapped onto the surface of the CSL structure. Approximately 180° views are shown. Red, orange, and blue coloring represent residues that are identical, similar, and unconserved, respectively.

**Figure S2** The L235D mutation in Hairless has no apparent effect on secondary structure.

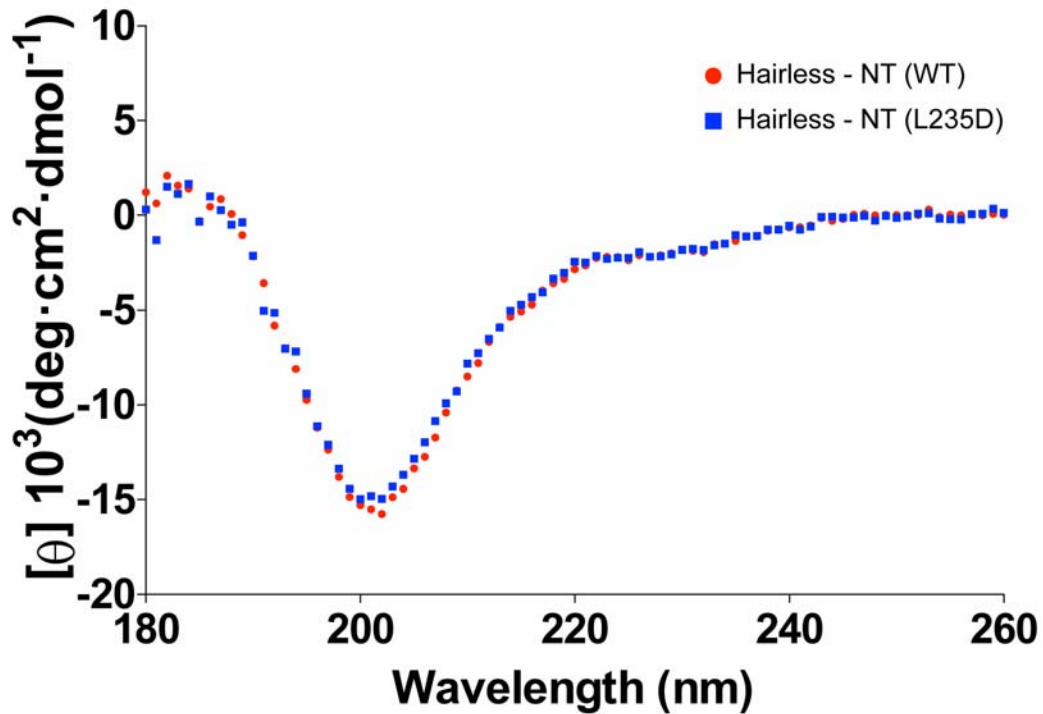

Far-UV circular dichroism spectroscopy for wild-type and Hairless mutant L235D (NT-LD). Experiments were performed at 25°C in a buffer containing 50mM sodium phosphate pH 6.5 and 150mM NaF with protein concentrations of 190 μM and 210μM for wild-type and L235D proteins, respectively. The NMRSD parameter values for wild-type and L235D were 0.05 and 0.07, respectively. Similar to wild-type Hairless NT, the CD spectrum of Hairless NT-LD has a minimum at ~200 nm, which is characteristic of random coil.

**Figure S3** Mam has no influence on the competition between ICN and Hairless for binding Su(H).

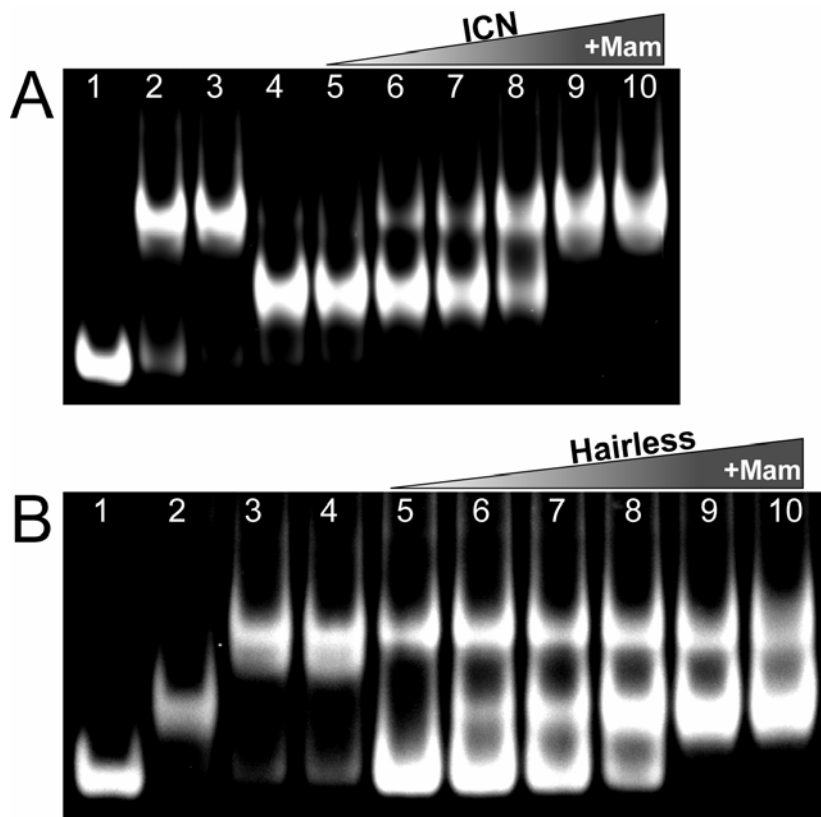

A) Mam has no observable effect on the displacement of Hairless from Su(H) by ICN; control lanes 1-5: Su(H), Su(H)-ICN, Su(H)-ICN-MAM, Su(H)-Hairless, Su(H)-Hairless-Mam complexes, respectively; lanes 6-10: preformed Su(H)-Hairless complexes titrated with increasing concentrations of ICN (0.5 μM, 1 μM, 2 μM, 4 μM, 6 μM) with Mam.

B) The inclusion of Mam has only a modest effect on the displacement of ICN from Su(H) by Hairless; control lanes 1-5: Su(H), Su(H)-Hairless, Su(H)-ICN-MAM, Su(H)-ICN, Su(H)-ICN-Mam (1 μM ICN) complexes, respectively; lanes 6-10: preformed Su(H)-ICN-Mam (1 μM ICN) complexes titrated with increasing concentrations of Hairless (0.5 μM, 1 μM, 2 μM, 5 μM, 20 μM).

For all EMSAs, unless otherwise noted, the concentrations of DNA, Su(H), Hairless (NT), ICN (RAMANK), and Mam are 1 μM, 0.1 μM, 4 μM, 4 μM, and 5 μM, respectively.
